# Supplementary material for: Human Genetic Susceptibility to Native Valve Staphylococcus aureus Endocarditis in Patients With S. aureus Bacteremia: Genome-Wide Association Study
Source: PubMed Central journal article supplement (PMC5893849; doi:10.3389/fmicb.2018.00640), 2018-04-04
Supplement: Image_1.pdf [file Image_1.pdf]

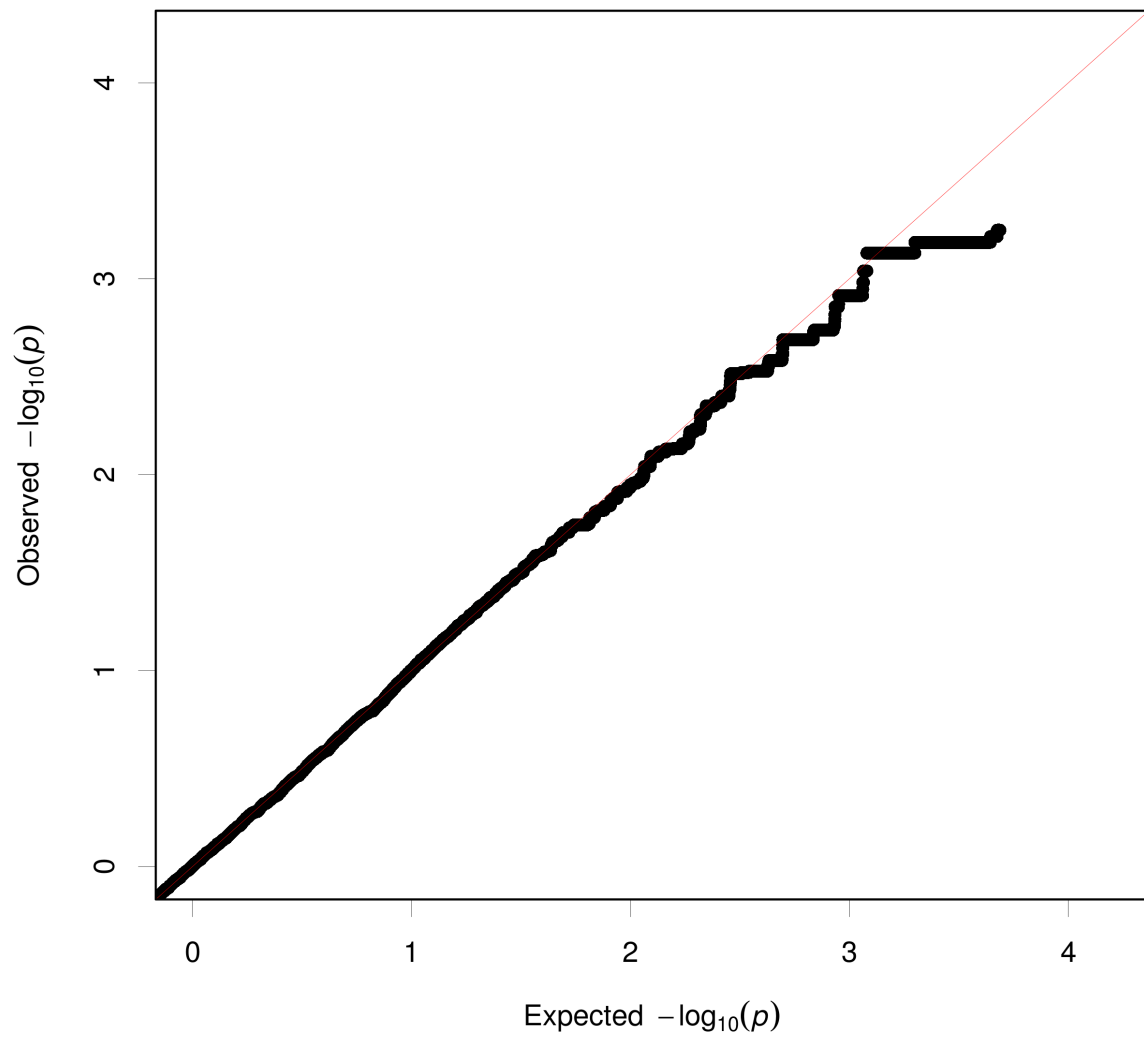

**Supplementary Fig 1.** Quantile-quantile plot of test statistics generated by the GWAS in 67 cases and 72 controls including 631,710 SNPs.
